# Supplementary material for: Changes on Techno-Functional, Thermal, Rheological, and Microstructural Properties of Tef Flours Induced by Microwave Radiation—Development of New Improved Gluten-Free Ingredients
Source: MDPI journal article supplement (doi:10.3390/foods12061345), 2023-03-22
Supplement: s1 [file s1]

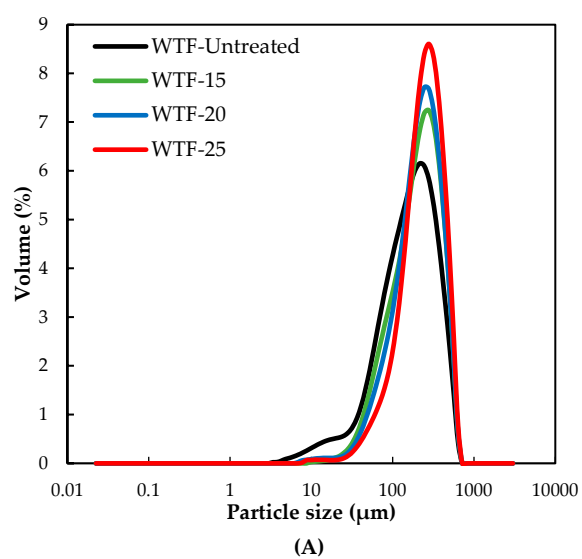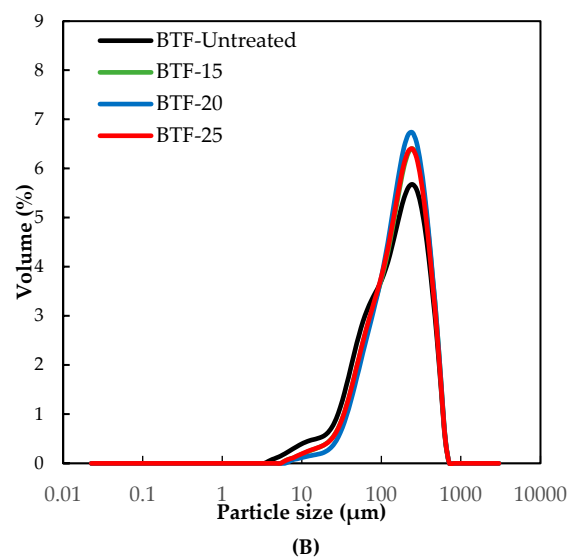

**Figure S1.** Particle size distribution of untreated and MW-treated tef flours at different moisture content (15%, 20%, and 25%). **(A)** White tef flour (WTF) and **(B)** brown tef flour (BTF).

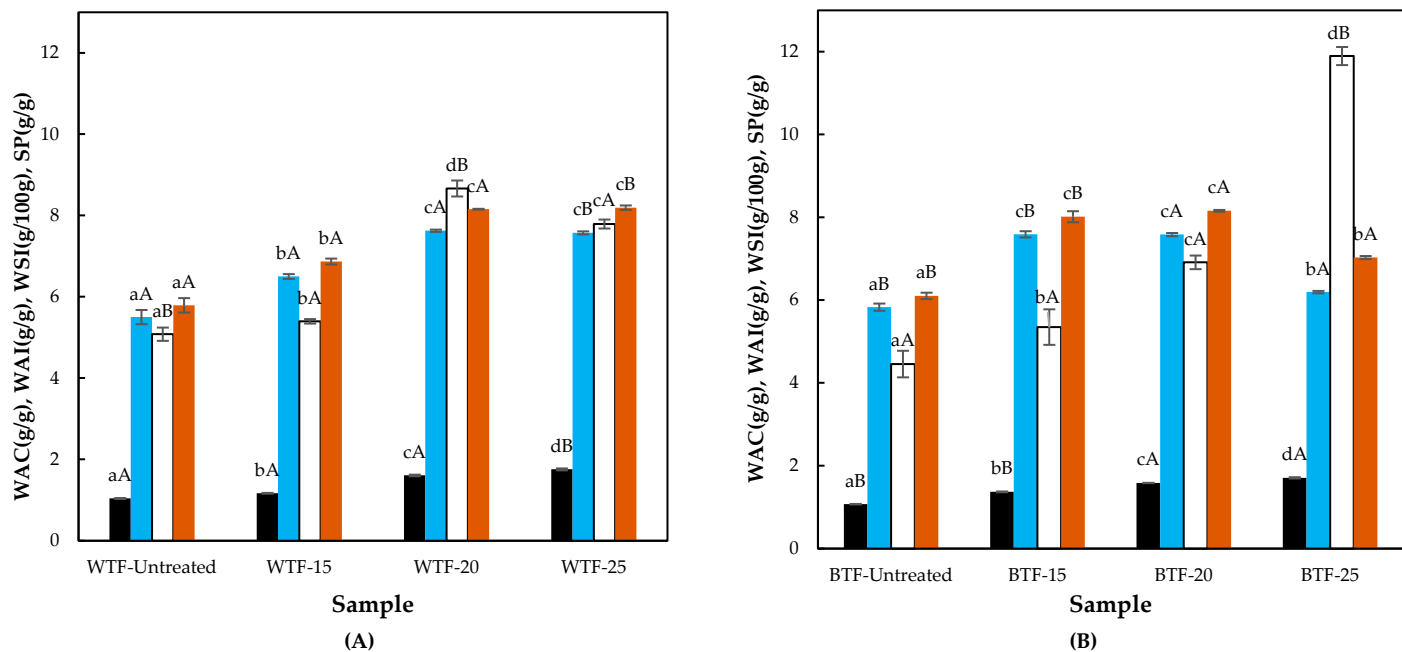

**Figure S2.** Hydration properties of untreated and MW-treated tef flours at different moisture content (15%, 20%, and 25%). **(A)** White tef flour (WTF) and **(B)** brown tef flour (BTF). WAC (water absorption capacity, g water/g flour dry matter) (black), WAI (water absorption index, g sediment/g flour dry matter) (blue), WSI (water solubility index, g soluble solids/100g flour dry matter) (white), and SP (swelling power, g sediment/g insoluble solids flour dry matter) (brown). Different letters in the corresponding column within each studied factor indicate statistically significant differences between means at  $p < 0.05$ . Lowercase letters are used to compare the effect of moisture content and capital letters to compare the effect of tef ecotype.

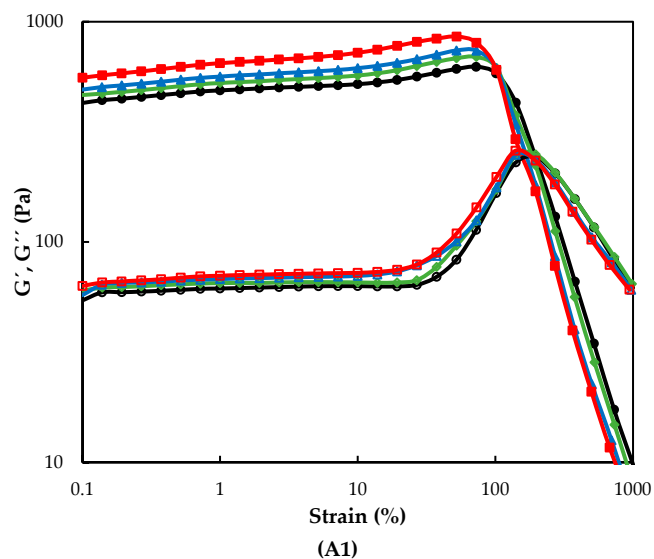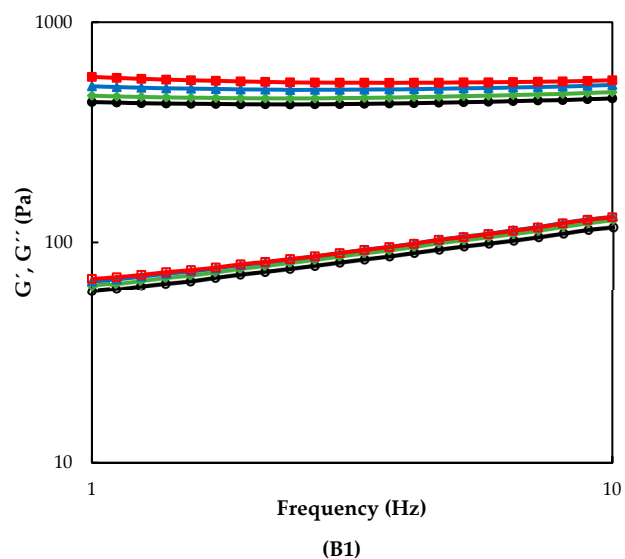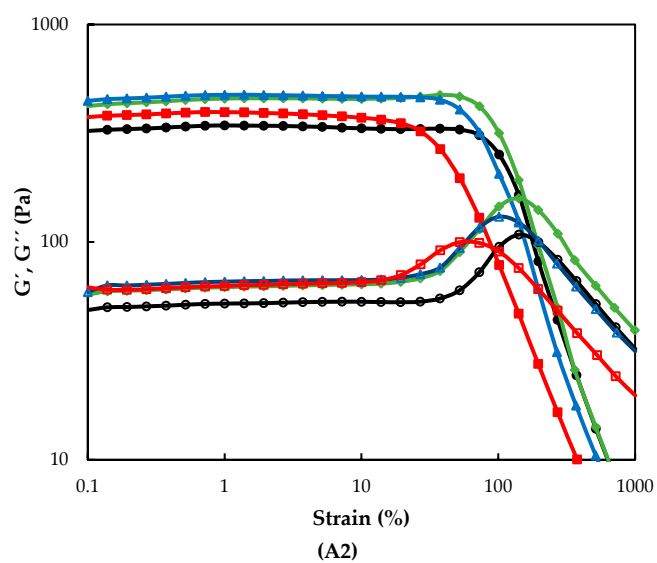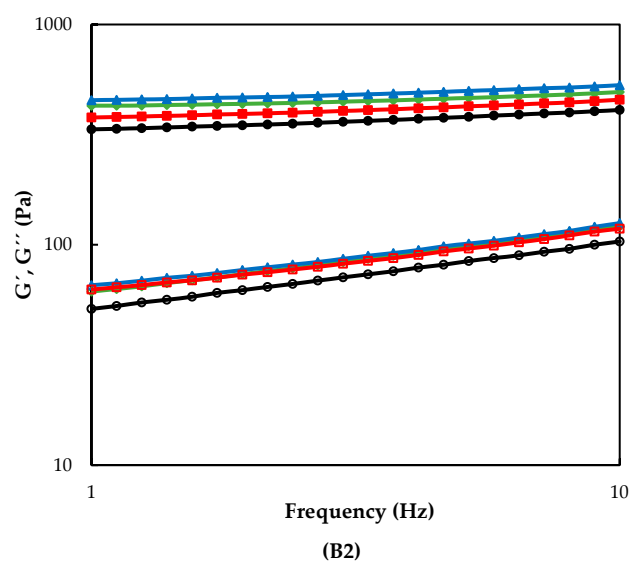

**Figure S3.** Strain sweeps (A) and frequency sweeps (B) of gels prepared from untreated white (1) and brown (2) tef flours ( $\bullet$ ), and 15% ( $\blacklozenge$ ), 20% ( $\blacktriangle$ ), and 25% ( $\blacksquare$ ) MW-treated samples.  $G'$  is represented by full symbols;  $G''$  is represented by empty symbols.
